# Supplementary material for: Enantioselective hydroxylation of nitroalkenes: an organocatalytic approach
Source: Royal Society of Chemistry journal article supplement (doi:10.1039/b707844g), 2007-01-01
Supplement: b707844g.pdf [file b707844g.pdf]

## Enantioselective Hydroxylation of Nitroalkenes: An Organocatalytic Approach

Peter Dinér, Martin Nielsen, Søren Bertelsen, Barbara Niess, and Karl Anker Jørgensen\*

*Danish National Research Foundation: Center for Catalysis, Department of Chemistry,  
Aarhus University, DK-8000 Aarhus C, Denmark  
[kaj@chem.au.dk](mailto:kaj@chem.au.dk)*

### Supporting Information

#### Contents

|                                        |    |
|----------------------------------------|----|
| General and Materials.....             | S2 |
| General Procedures.....                | S2 |
| Analytical and Spectroscopic Data..... | S4 |

**General Methods.** NMR spectra were acquired on a Varian AS 400 spectrometer, running at 400 and 100 MHz for  $^1\text{H}$  and  $^{13}\text{C}$ , respectively. Chemical shifts ( $\delta$ ) are reported in ppm relative to residual solvent signals ( $\text{CHCl}_3$ , 7.26 ppm for  $^1\text{H}$  NMR,  $\text{CDCl}_3$ , 77.0 ppm for  $^{13}\text{C}$  NMR).  $^{13}\text{C}$  NMR spectra were acquired on a broad band decoupled mode. Mass spectra were recorded on a Micromass LCT spectrometer using electrospray ( $\text{ES}^+$ ) ionization techniques. Analytical thin layer chromatography (TLC) was performed using pre-coated aluminium-backed plates (Merck Kieselgel 60 F254) and visualized by ultraviolet irradiation or  $\text{KMnO}_4$  dip. Optical rotations were measured on a Perkin-Elmer 241 polarimeter. The enantiomeric excess (ee) of the products was determined by chiral stationary phase HPLC (Daicel Chiralpak AD or Daicel Chiralcel OD/OJ columns).

**Materials.** Analytical grade solvents and commercially available reagents were used as received. For flash chromatography (FC) Iatrobeads (Iatrobeads 6RS-8060) or silica gel (Silica gel 60, 230-400 mesh) was used.

**Racemic** samples were prepared using  $\text{Et}_3\text{N}$  or a mixture of the catalysts **4a** and **4b**. Procedure for preparation of racemic samples using  $\text{Et}_3\text{N}$ : To a sample vial equipped with a magnetic stirring bar and nitroalkene **1** (1 equiv, 0.25 M) in toluene was added oxime **2** (2 equiv.) and  $\text{Et}_3\text{N}$  (1 equiv.). After full conversion as monitored by  $^1\text{H}$  NMR the reaction mixture was loaded onto Iatrobeads and the product **5** was obtained by FC.

**General Procedure for the Oxime Addition to Nitroalkenes:** To a sample vial equipped with a magnetic stirring bar was added the catalyst **4d** (5 mol%, 0.0125 mmol), nitroalkene **1** (0.25 mmol) and toluene (1.0 mL). The mixture was stirred for 15 min at  $-24^\circ\text{C}$  and oxime **2** (0.50 mmol) was added. After 16 h (or the time indicated – monitored by  $^1\text{H}$  NMR), the reaction was completed and the reaction mixture was loaded onto Iatrobeads and the product **5** was obtained by FC.

**General Procedure for the Reduction of 5 to Nitro Alcohols 6:** Compound **5** (0.4 mmol) was dissolved in THF (1.0 mL).  $\text{ZrCl}_4$  (120 mg, 1.3 equiv.) and  $\text{NaBH}_4$  (61 mg, 4 eq) were mixed in THF (1.0 mL) and this was added to the stirred solution of the oxime ether **5** at  $0^\circ\text{C}$ . After full conversion of **5**,  $\text{HCl}_{(\text{aq})}$  (1M, 1.0 mL) was added dropwise.  $\text{NaOH}_{(\text{aq})}$  (1M) was then added until basic pH was achieved. The aqueous phase was extracted with  $\text{EtOAc}$  (5 x 1 mL), dried ( $\text{MgSO}_4$ ) and evaporated. FC afforded the pure product.

**General Procedure for the Hydrogenation of 5 to Amino Alcohol 7:** Compound **5** (0.5 mmol) was dissolved in  $\text{EtOAc}$  (7.5 mL). 10% Pd/C (81 mg) was added and the stirred suspension was hydrogenated

at 15 bar. After 3.5 h the suspension was filtered through Celite. The EtOAc was evaporated and the crude amino alcohol dissolved in DMF (5 mL). To the stirred solution was added (Boc)<sub>2</sub>O and Et<sub>3</sub>N. After 3 h Et<sub>2</sub>O (5 mL) was added and the organic layer was extracted thoroughly with water. The organic layer was dried (MgSO<sub>4</sub>) and evaporated. FC afforded the pure product **7**.

**Notice about HPLC-traces.** As stated in the manuscript (ref. 10), the products **5** are unstable. It was therefore not possible for some of the products to obtain a steady baseline in HPLC, as the products decomposed by the contact with *i*-PrOH and the various column materials.

**(E)-Ethyl 2-(1-nitroheptan-2-yloxyimino)acetate (5a):**

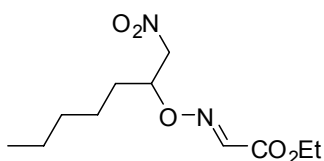

The title compound was obtained according to the general procedure as colourless oil (79% yield) after 16 h reaction.  $^1\text{H}$  NMR ( $\text{CDCl}_3$ )  $\delta$  7.48 (s, 1H), 4.91-4.85 (m, 1H), 4.63 (dd,  $J = 7.6, 12.8$  Hz, 1H), 4.50 (dd,  $J = 4.0, 12.9$  Hz, 1H), 4.28 (q,  $J = 7.1$  Hz, 2H), 1.81-1.72 (m, 1H), 1.65-1.57 (m, 1H), 1.43-1.21 (m, 9H), 0.87 (t,  $J = 6.5$  Hz, 3H).  $^{13}\text{C}$  NMR ( $\text{CDCl}_3$ )  $\delta$  161.4, 142.3, 81.0, 77.3, 61.7, 31.3, 30.9, 24.5, 22.3, 14.0, 13.8, HRMS calc.:  $\text{C}_{11}\text{H}_{20}\text{N}_2\text{NaO}_5^+$  283.1264; found: 283,1257. The ee was determined by chiral HPLC using a Chiralcel OD column;  $\tau_{\text{major}} = 11.1$  min,  $\tau_{\text{minor}} = 10.2$  min (91% ee).  $[\alpha]_{\text{D}}^{23} +10.5$  (c 1.05,  $\text{CHCl}_3$ ).

**(E)-tert-Butyl 2-(1-nitroheptan-2-yloxyimino)acetate (5b):**

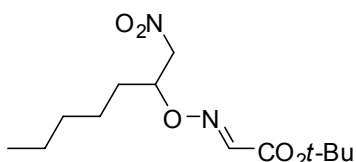

The title compound was obtained according to the general procedure as colourless oil (83% yield) after 16 h.  $^1\text{H}$  NMR ( $\text{CDCl}_3$ )  $\delta$  7.42 (s, 1H), 4.98-4.78 (m, 1H), 4.66 (dd,  $J = 7.5, 12.8$  Hz, 1H), 4.52 (dd,  $J = 4.1, 12.8$  Hz, 1H), 1.86-1.73 (m, 1H), 1.70-1.57 (m, 1H), 1.51 (s, 9H), 1.46-1.20 (m, 6H), 0.87 (t,  $J = 6.8$  Hz, 3H).  $^{13}\text{C}$  NMR ( $\text{CDCl}_3$ )  $\delta$  160.4, 143.5, 82.9, 80.7, 77.3, 31.3, 30.8, 27.9 (3C), 24.6, 22.3, 13.9. HRMS calc.:  $\text{C}_{13}\text{H}_{24}\text{N}_2\text{NaO}_5^+$  311.1577; found: 311.1576. The ee was determined by chiral HPLC using a Chiralcel OD column;  $\tau_{\text{major}} = 9.5$  min,  $\tau_{\text{minor}} = 8.9$  min (90% ee).  $[\alpha]_{\text{D}}^{23} +12.5$  (c 1.01,  $\text{CH}_2\text{Cl}_2$ ).

**(E)-Ethyl 2-(1-cyclohexyl-2-nitroethoxyimino)acetate (5c):**

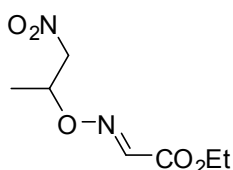

The title compound was obtained according to the general procedure as colourless oil (63% yield) after 16 h reaction.  $^1\text{H}$  NMR ( $\text{CDCl}_3$ )  $\delta$  7.49 (s, 1H), 5.17-4.99 (m, 1H), 4.66 (dd,  $J = 7.7, 13.0$  Hz, 1H), 4.51 (dd,  $J = 4.1, 12.9$  Hz, 1H), 4.30 (q,  $J = 7.1$  Hz, 2H), 1.42 (d,  $J = 6.6$  Hz, 3H), 1.33 (t,  $J = 7.1$  Hz, 3H).  $^{13}\text{C}$  NMR ( $\text{CDCl}_3$ )  $\delta$  161.4, 142.4, 78.1, 77.1, 61.8, 16.9, 14.1. HRMS calc.:  $\text{C}_7\text{H}_{12}\text{N}_2\text{NaO}_5^+$  227.0638; found: 227.0635. The ee was determined by chiral HPLC using a Chiralcel OJ column;  $\tau_{\text{major}} = 21.3$  min,  $\tau_{\text{minor}} = 18.8$  min (90% ee).  $[\alpha]_{\text{D}}^{23} +1.8$  (c 1.04,  $\text{CH}_2\text{Cl}_2$ ).

**(E)-Ethyl 2-(3,3-dimethyl-1-nitrobutan-2-yloxyimino)acetate (5d):**

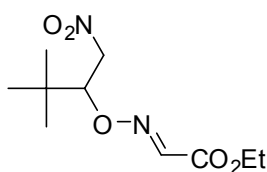

The title compound was obtained according to the general procedure as colourless oil (69% yield).  $^1\text{H}$  NMR ( $\text{CDCl}_3$ )  $\delta$  7.49 (s, 1H), 4.86 (ddd,  $J = 6.1, 12.2, 18.4$  Hz, 1H), 4.58 (d,  $J = 6.4$  Hz, 1H), 4.34 (q,  $J = 7.1$  Hz, 1H), 1.32 (t,  $J = 6.0$  Hz, 3H), 1.0 (s, 9H).  $^{13}\text{C}$  NMR ( $\text{CDCl}_3$ )  $\delta$  161.5, 141.4, 89.3, 75.8, 61.7, 34.7, 26.0 (3C), 14.1. HRMS calc.:  $\text{C}_{10}\text{H}_{18}\text{N}_2\text{NaO}_5^+$  269.1108; found: 269.1114. The ee was determined by chiral HPLC using a Chiralcel OD column;  $\tau_{\text{major}} = 12.2$  min,  $\tau_{\text{minor}} = 11.2$  min (90% ee).  $[\alpha]_{\text{D}}^{23} -1.7$  [c 0.57,  $\text{CH}_2\text{Cl}_2$ ].

**(E)-Ethyl 2-(1-cyclohexyl-2-nitroethoxyimino)acetate (5e):**

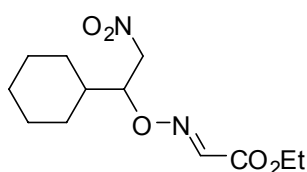

The title compound was obtained according to the general procedure as colourless oil (82% yield).  $^1\text{H}$  NMR ( $\text{CDCl}_3$ )  $\delta$  7.45 (s, 1H), 4.79-4.75 (m, 1H), 4.61 (dd,  $J = 12.9, 8.4$  Hz, 1H), 4.51 (dd,  $J = 12.9, 3.5$  Hz, 1H), 4.24 (q,  $J = 7.1$  Hz, 2H), 1.86-1.47 (m, 6H), 1.27 (t, 3H), 1.23-0.89 (m, 5H).  $^{13}\text{C}$  NMR ( $\text{CDCl}_3$ )  $\delta$  161.4, 142.1, 85.4, 75.6, 61.7, 39.2, 28.3, 28.2, 26.0, 25.7, 25.6, 14.0. HRMS calc.:  $\text{C}_{12}\text{H}_{20}\text{N}_2\text{NaO}_5^+$  295.1264; found: 295.1264. The ee was determined by chiral HPLC using a Chiralcel OD column;  $\tau_{\text{major}} = 18.3$  min,  $\tau_{\text{minor}} = 14.9$  min (90% ee).  $[\alpha]_{\text{D}}^{23} +7.8$  (c 1.06,  $\text{CH}_3\text{Cl}_2$ ).

**(E)-Ethyl 2-(1-nitro-4-phenylbutan-2-yloxyimino)acetate (5f):**

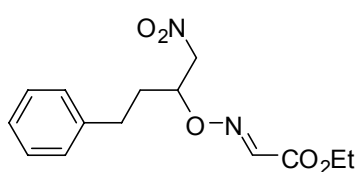

The title compound was obtained according to the general procedure as colourless oil (68% yield).  $^1\text{H}$  NMR ( $\text{CDCl}_3$ )  $\delta$  7.51 (s, 1H), 7.09-7.32 (m, 5H), 4.89-4.83 (m, 1H), 4.66 (dd,  $J = 7.4, 12.9$  Hz, 1H), 4.50 (dd,  $J = 4.0, 12.9$  Hz, 1H), 4.29 (q,  $J = 7.1$  Hz, 2H), 2.89-2.58 (m, 2H), 2.22-2.06 (m, 1H), 2.01-1.89 (m, 1H) 1.32 (t,  $J = 7.1$  Hz, 3H).  $^{13}\text{C}$  NMR ( $\text{CDCl}_3$ )  $\delta$  161.3, 142.6, 140.1, 128.6 (2C), 128.3 (2C), 126.3, 80.1, 77.2, 61.8, 32.5, 31.0, 14.0. HRMS calc.:  $\text{C}_{14}\text{H}_{18}\text{N}_2\text{NaO}_5^+$  317.1108; found: 317.1107. The ee was determined by chiral HPLC using a Chiralcel OJ column;  $\tau_{\text{major}} = 43.3$  min,  $\tau_{\text{minor}} = 34.5$  min (89% ee).  $[\alpha]_{\text{D}}^{23} +37.3$  (c 0.86,  $\text{CHCl}_3$ ).

**(E)-Ethyl 2-((E)-1-nitrohex-4-en-2-yloxyimino)acetate (5g):**

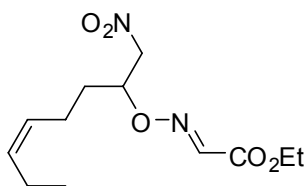

The title compound was obtained according to the general procedure as colourless oil (79% yield).  $^1\text{H}$  NMR ( $\text{CDCl}_3$ )  $\delta$  7.47 (s, 1H), 5.41-5.31 (m, 1H), 5.25-5.19 (m, 1H), 4.90-4.83 (m, 1H), 4.63 (dd,  $J = 7.4, 12.8$  Hz, 1H), 4.50 (dd,  $J = 4.0, 12.8$  Hz, 1H), 4.25 (q,  $J = 7.1$  Hz, 2H), 2.13-2.08 (m, 2H), 1.99-1.92 (m, 2H), 1.89-1.80 (m, 1H), 1.68-1.60 (m, 1H), 1.28 (t,  $J = 7.1$  Hz, 3H), 0.89 (t,  $J = 7.5$  Hz, 3H).  $^{13}\text{C}$  NMR ( $\text{CDCl}_3$ )  $\delta$  161.4, 142.4, 133.6, 126.5, 80.3, 77.3, 61.8, 30.8, 22.5, 20.5, 14.1 (2C). HRMS calc.:  $\text{C}_{12}\text{H}_{20}\text{N}_2\text{NaO}_5^+$  295.1264; found: 295.1276. The ee was determined by HPLC using a Chiralcel OD column;  $\tau_{\text{major}} = 19.6$  min,  $\tau_{\text{minor}} = 18.0$  min (93% ee).  $[\alpha]_{\text{D}}^{23} +33.2$  (c 0.56,  $\text{CH}_2\text{Cl}_2$ ).

**(E)-Methyl 6-(2-ethoxy-2-oxoethylideneaminoxy)-7-nitroheptanoate (5h):**

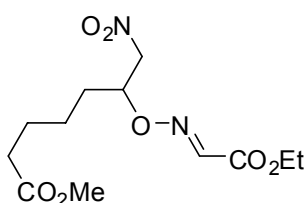

The title compound was obtained according to the general procedure as colourless oil (68% yield) after 5d reaction.  $^1\text{H}$  NMR ( $\text{CDCl}_3$ )  $\delta$  7.50 (s, 1H), 4.95-4.89 (m, 1H), 4.67 (dd,  $J = 7.5, 12.9$  Hz, 1H), 4.54 (dd,  $J = 4.0, 12.9$  Hz, 1H), 4.30 (q,  $J = 7.1$  Hz, 2H), 3.66 (s, 3H), 2.32 (t,  $J = 7.4$  Hz, 2H), 1.89-1.78 (m, 1H), 1.75-1.58 (m, 2H), 1.54-1.36 (m, 3H), 1.34 (t,  $J = 7.1$  Hz, 3H).  $^{13}\text{C}$  NMR ( $\text{CDCl}_3$ )  $\delta$  173.5, 161.2, 142.4, 80.6, 76.5, 61.7, 51.4, 33.4, 30.4, 24.2 (2C), 13.9. HRMS calc.:  $\text{C}_{12}\text{H}_{20}\text{N}_2\text{NaO}_7^+$  327.1163; found: 327.1162. The ee was determined by chiral HPLC using a Chiralcel OD column;  $\tau_{\text{major}} = 13.0$  min,  $\tau_{\text{minor}} = 11.5$  min (90% ee).  $[\alpha]_{\text{D}}^{23} +12.6$  (c 1.1,  $\text{CH}_2\text{Cl}_2$ ).

**(E)-Ethyl 2-(4-(methylthio)-1-nitrobutan-2-yloxyimino)acetate (5i):**

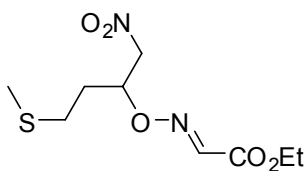

The title compound was obtained according to the general procedure as yellow oil (82% yield).  $^1\text{H}$  NMR ( $\text{CDCl}_3$ )  $\delta$  7.52 (s, 1H), 5.11-5.05 (m, 1H), 4.73 (dd,  $J = 7.2, 12.9$  Hz, 1H), 4.61 (dd,  $J = 4.2, 12.9$  Hz, 1H), 4.30 (q,  $J = 7.1$  Hz, 2H), 2.66-2.53 (m, 2H), 2.18-2.10 (m, 1H), 2.10 (s, 3H), 1.99-1.91 (m, 1H), 1.33 (t,  $J = 7.14$  Hz, 3H).  $^{13}\text{C}$  NMR ( $\text{CDCl}_3$ )  $\delta$  161.2, 142.8, 79.4, 77.0, 61.9, 30.3, 29.4, 15.5, 14.0. HRMS calc.:  $\text{C}_9\text{H}_{16}\text{N}_2\text{NaO}_5\text{S}^+$  287.0672; found: 287.0677. The ee was determined by chiral HPLC using a Chiralpak AD column;  $\tau_{\text{major}} = 16.9$  min,  $\tau_{\text{minor}} = 15.6$  min (89% ee).  $[\alpha]_{\text{D}}^{23} +32.4$  (c 1.01,  $\text{CH}_2\text{Cl}_2$ ).

**(E)-Ethyl 2-(2-nitrocyclohexyloxyimino)acetate (5j):**

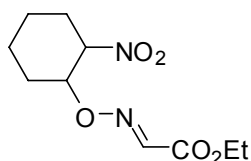

The title compound was obtained according to the general procedure as colourless oil (73% yield, dr = 20:1).  $^1\text{H}$  NMR ( $\text{CDCl}_3$ )  $\delta$  7.47 (s, 1H), 5.11-5.08 (m, 1H), 4.52 (dt,  $J = 4.0, 10.9$  Hz, 1H), 4.30 (q,  $J = 7.1$  Hz, 2H), 2.31 (ddd,  $J = 4.0, 6.9, 8.7$  Hz, 1H), 2.21-2.04 (m, 2H), 1.91 (ddd,  $J = 4.2, 8.6, 13.0$  Hz, 1H), 1.63-1.54 (m, 1H), 1.52-1.45 (m, 2H), 1.38-1.32 (m, 1H), 1.29 (t,  $J = 7.1$  Hz, 3H).  $^{13}\text{C}$  NMR ( $\text{CDCl}_3$ )  $\delta$  161.5, 142.2, 84.0, 80.2, 61.8, 28.6, 24.6, 22.8, 19.3, 14.1. HRMS calc.:  $\text{C}_{10}\text{H}_{16}\text{N}_2\text{NaO}_5^+$  267.0951; found: 267.0953. The ee was determined by chiral HPLC using a Chiralcel OJ column; *major diastereomer*:  $\tau_{\text{major}} = 17.6$  min,  $\tau_{\text{minor}} = 13.2$  min (48% ee), *minor diastereomer*:  $\tau_{\text{major}} = 11.5$  min,  $\tau_{\text{minor}} = 10.7$  min (42% ee).  $[\alpha]_{\text{D}}^{23} -21.7$  (c 0.90,  $\text{CHCl}_3$ ).

**(R)-1-Cyclohexyl-2-nitroethanol (6e):**

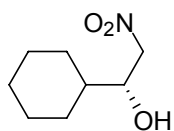

The title compound was obtained according to the general procedure. Spectroscopic data were identical to those reported in literature.<sup>1</sup>  $[\alpha]_{\text{D}}^{23} -11.6$  (c 1.40,  $\text{CHCl}_3$ ). [Lit<sup>1</sup>: -20.3 (c = 1.2,  $\text{CHCl}_3$ )].

***tert*-Butyl 2-cyclohexyl-2-hydroxyethylcarbamate (7e):**

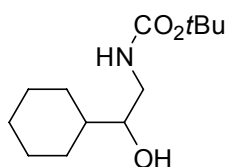

The title compound was obtained according to the general procedure as colourless crystals at 4 °C.  $^1\text{H}$  NMR ( $\text{CDCl}_3$ )  $\delta$  5.02 (bs, 1H), 3.44-3.26 (m, 2H), 3.10-2.93 (m, 1H), 2.61 (bs, 1H), 1.89-1.56 (m, 5H), 1.42 (s, 9H), 1.36-1.29 (m, 1H), 1.28-0.93 (m, 5H).  $^{13}\text{C}$  NMR ( $\text{CDCl}_3$ )  $\delta$  156.8, 79.4, 75.7, 44.4, 41.8, 28.9, 28.3 (3C), 28.2, 26.3, 26.1, 25.9. HRMS calc.:  $\text{C}_{13}\text{H}_{25}\text{NNaO}_3^+$  266.1727; found: 266.1721.

<sup>1</sup> C. Palomo, M. Oiarbide, A. Laso *Angew. Chem. Int. Ed.* 2005, **44**, 3881.

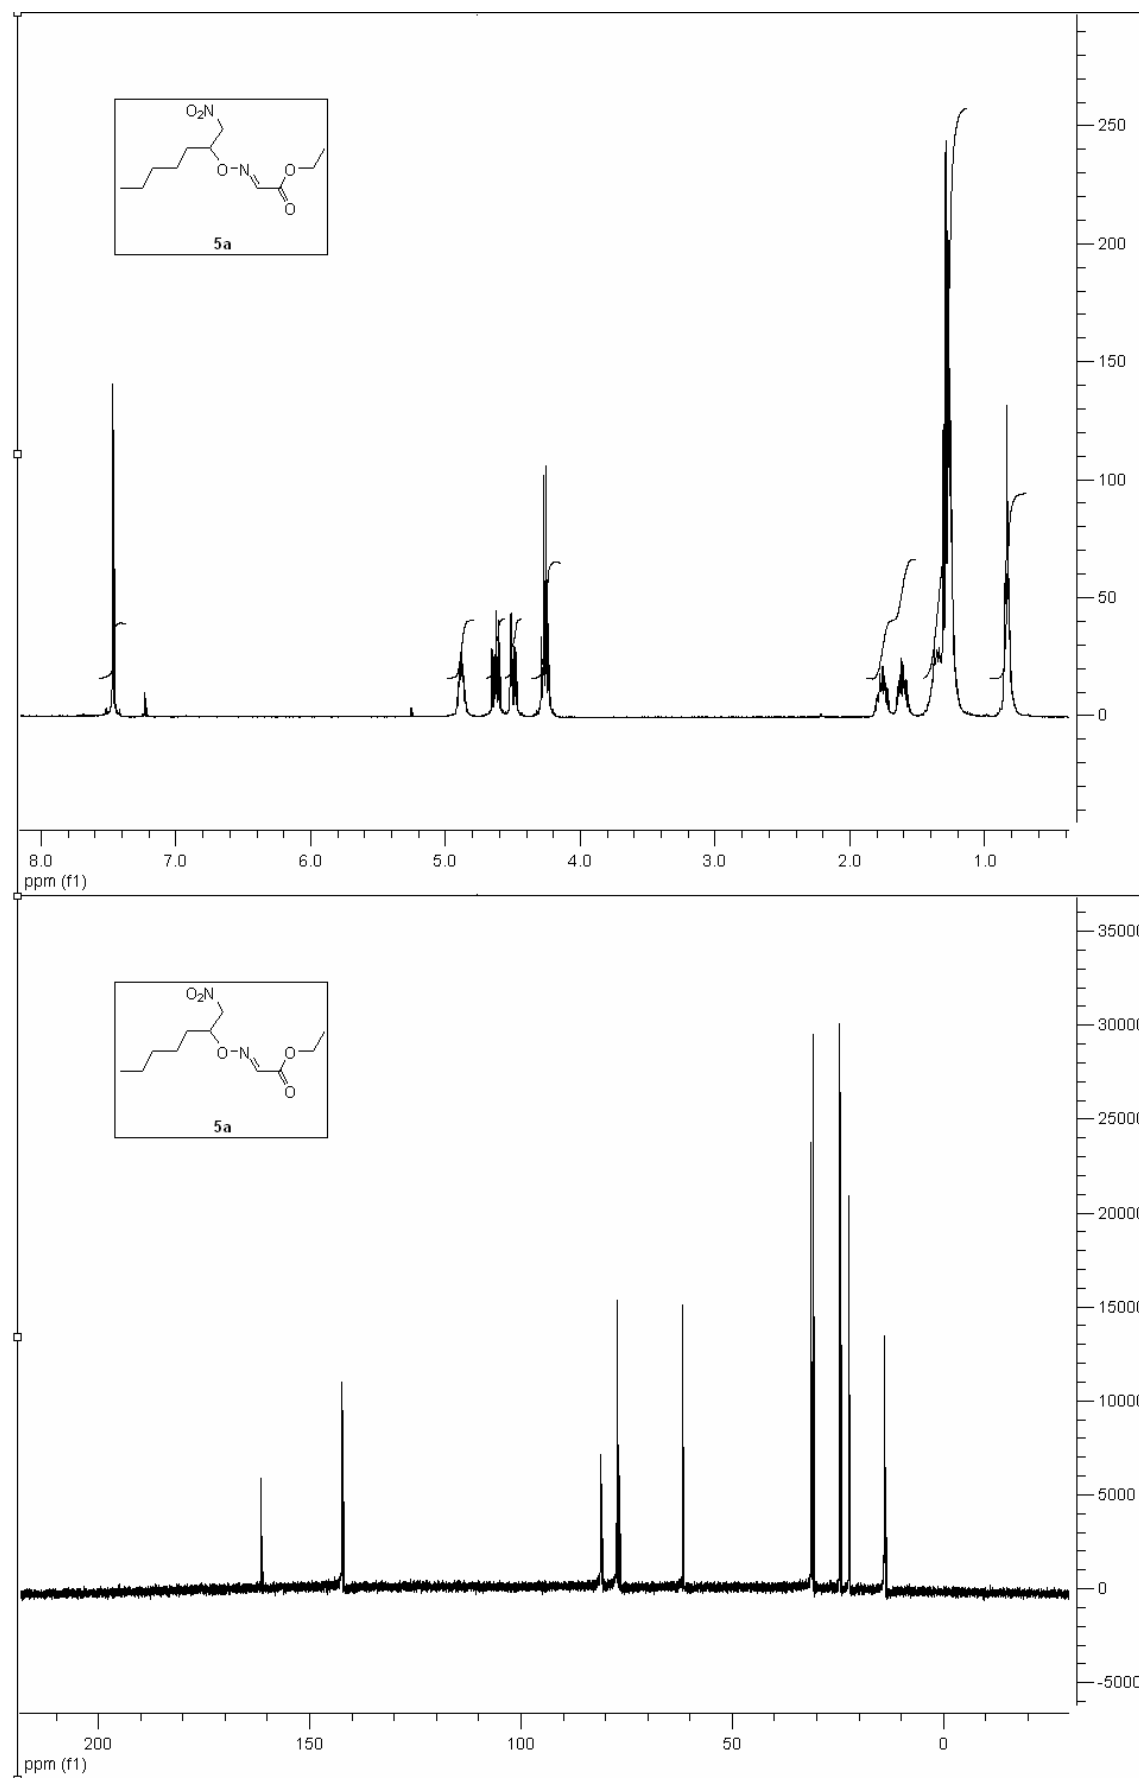





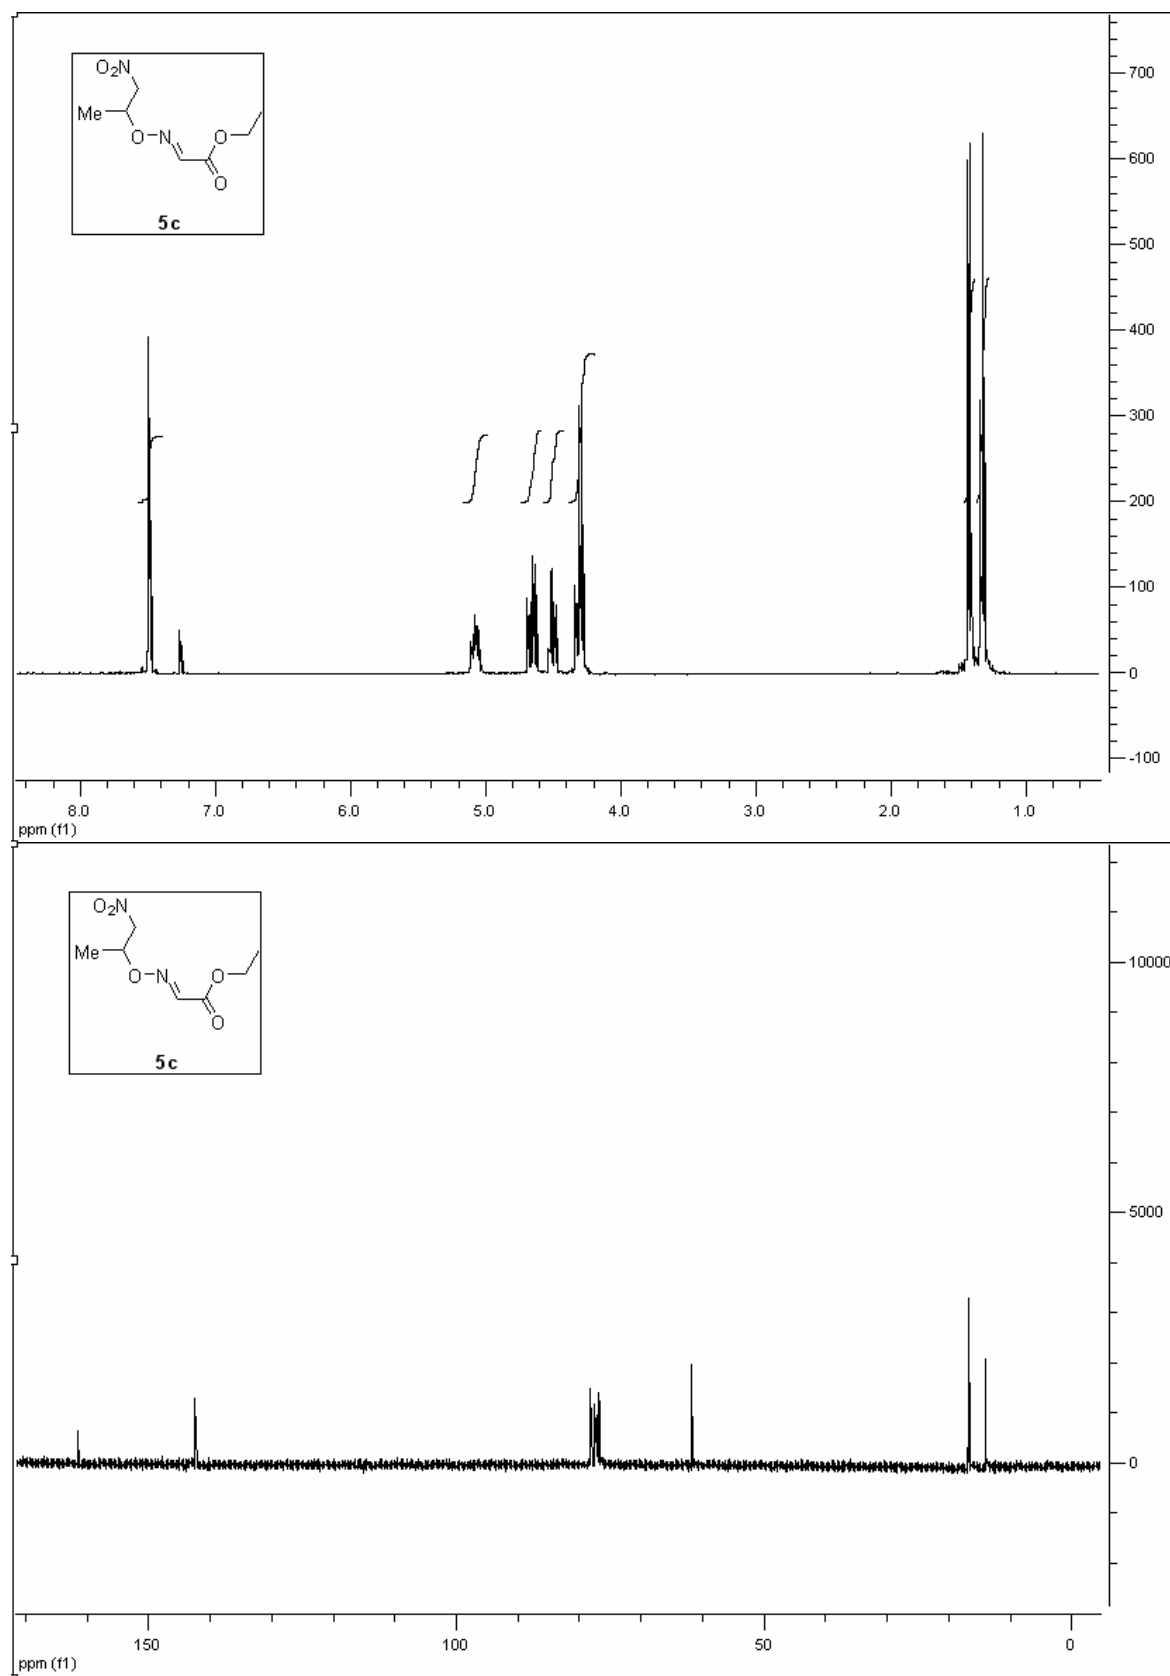

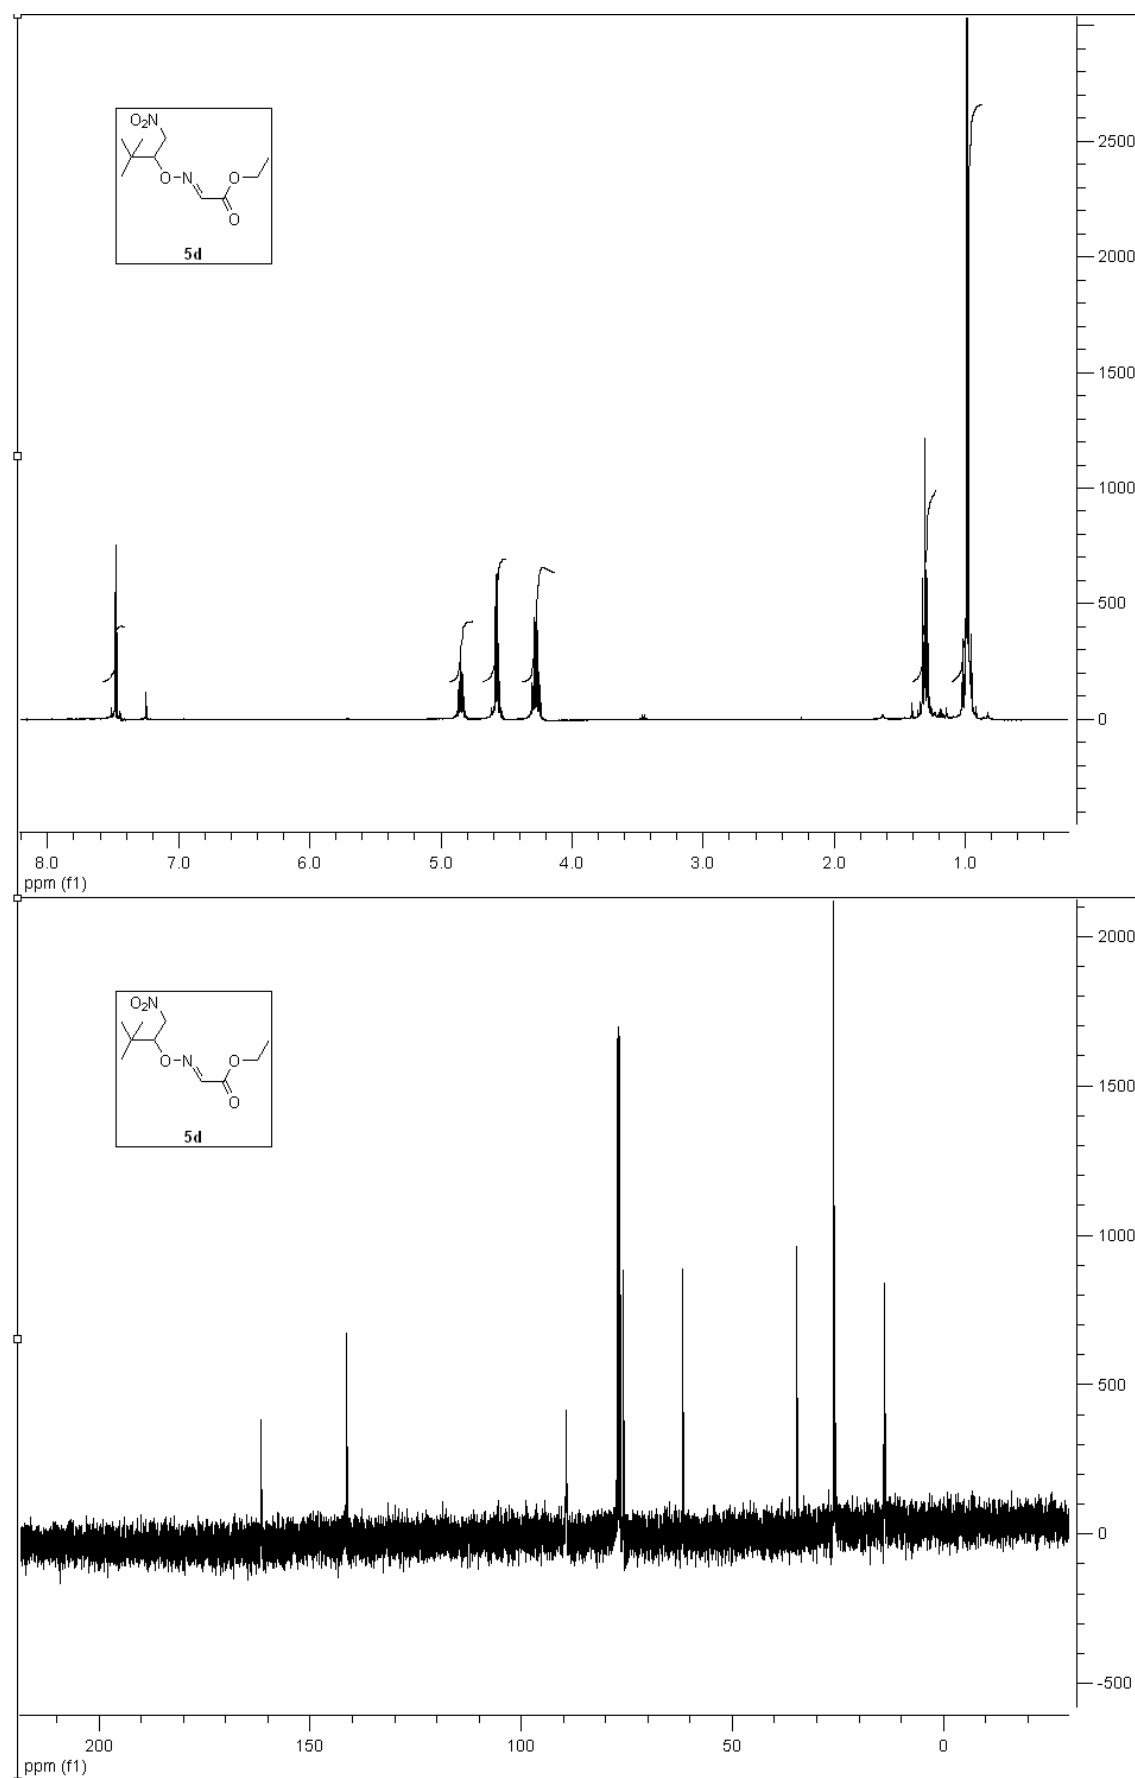

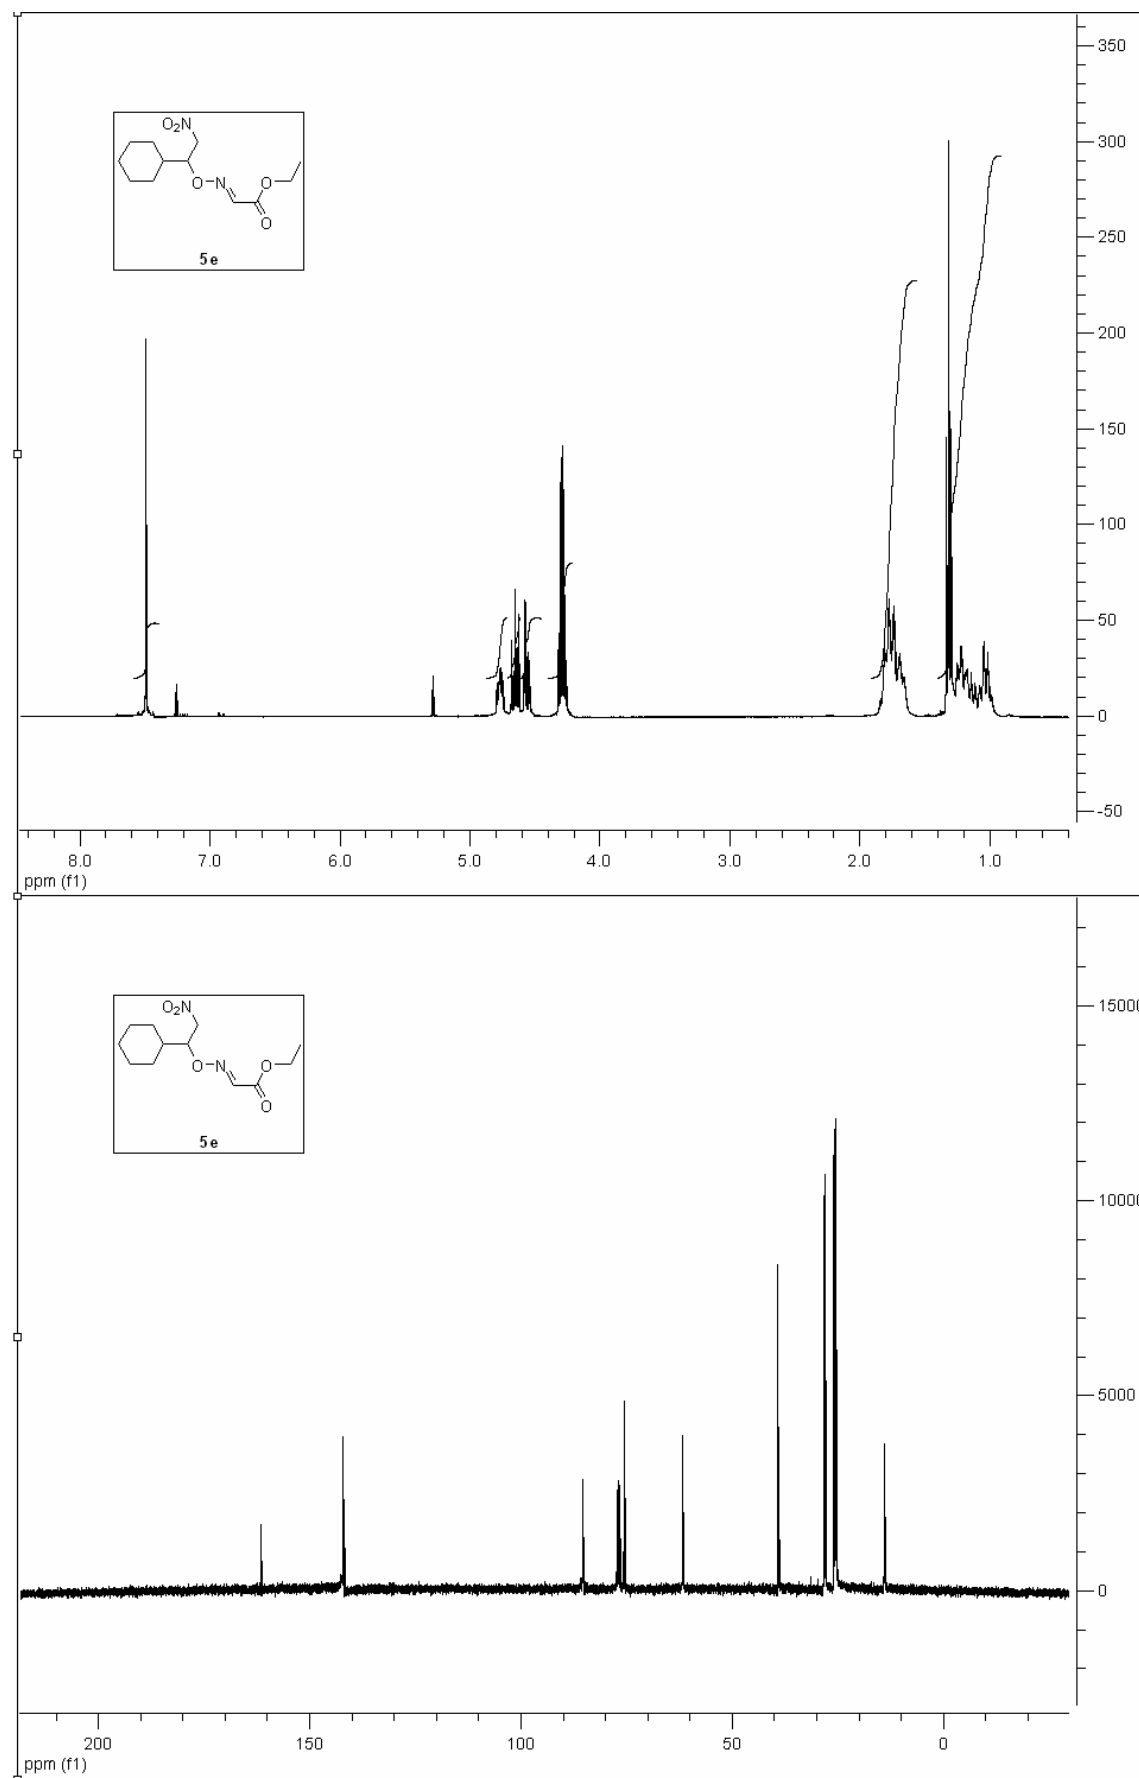

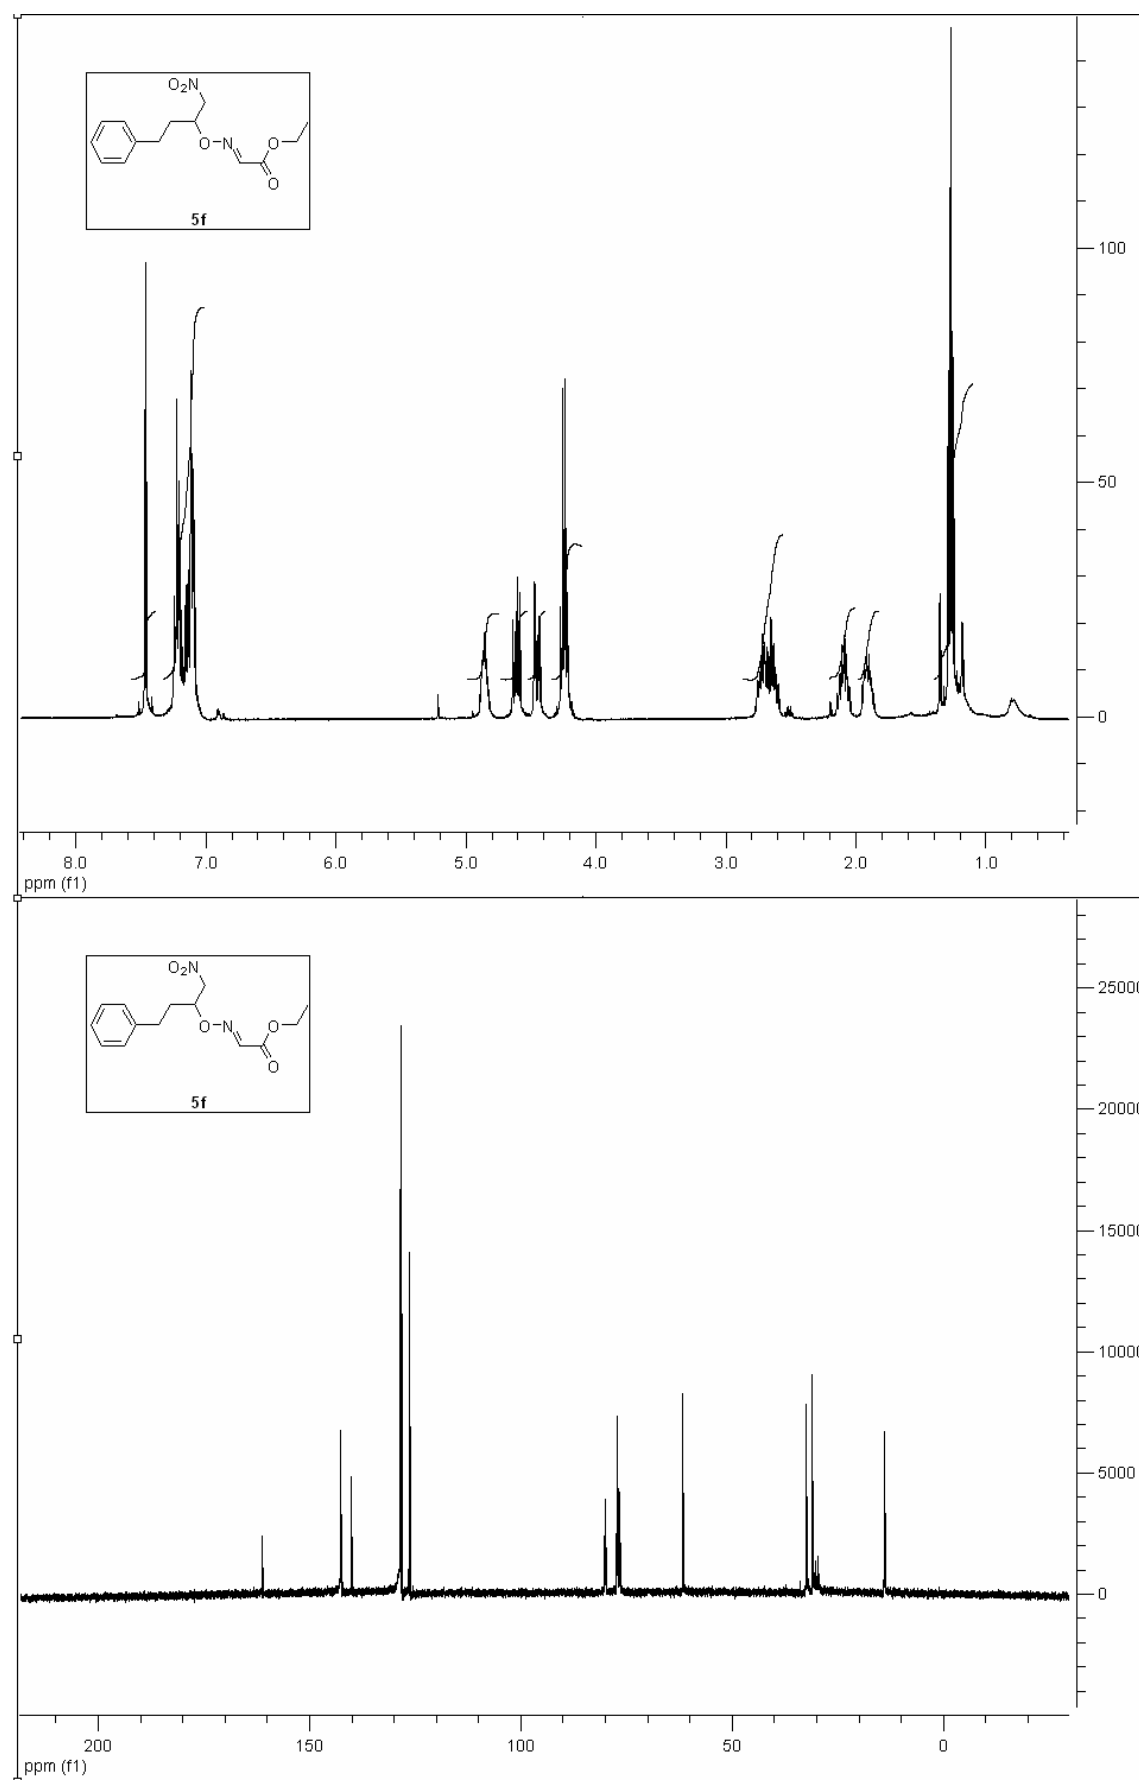

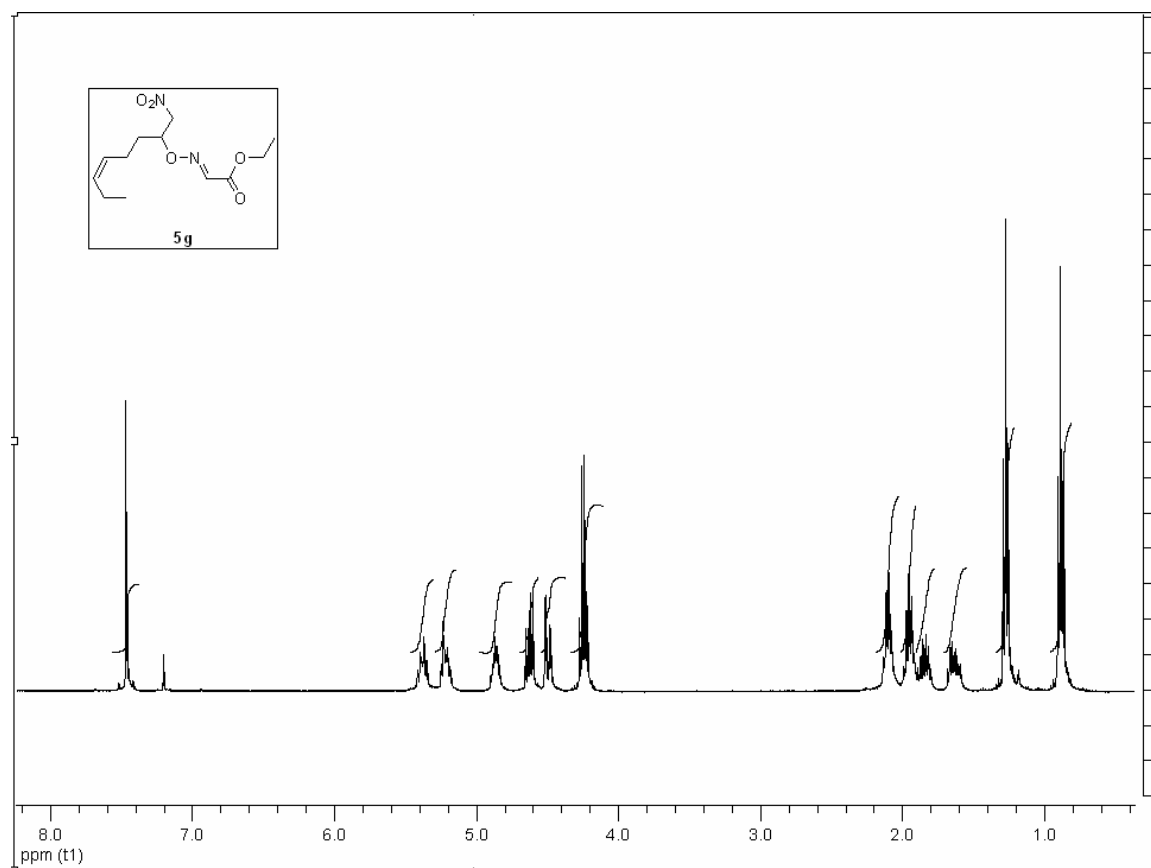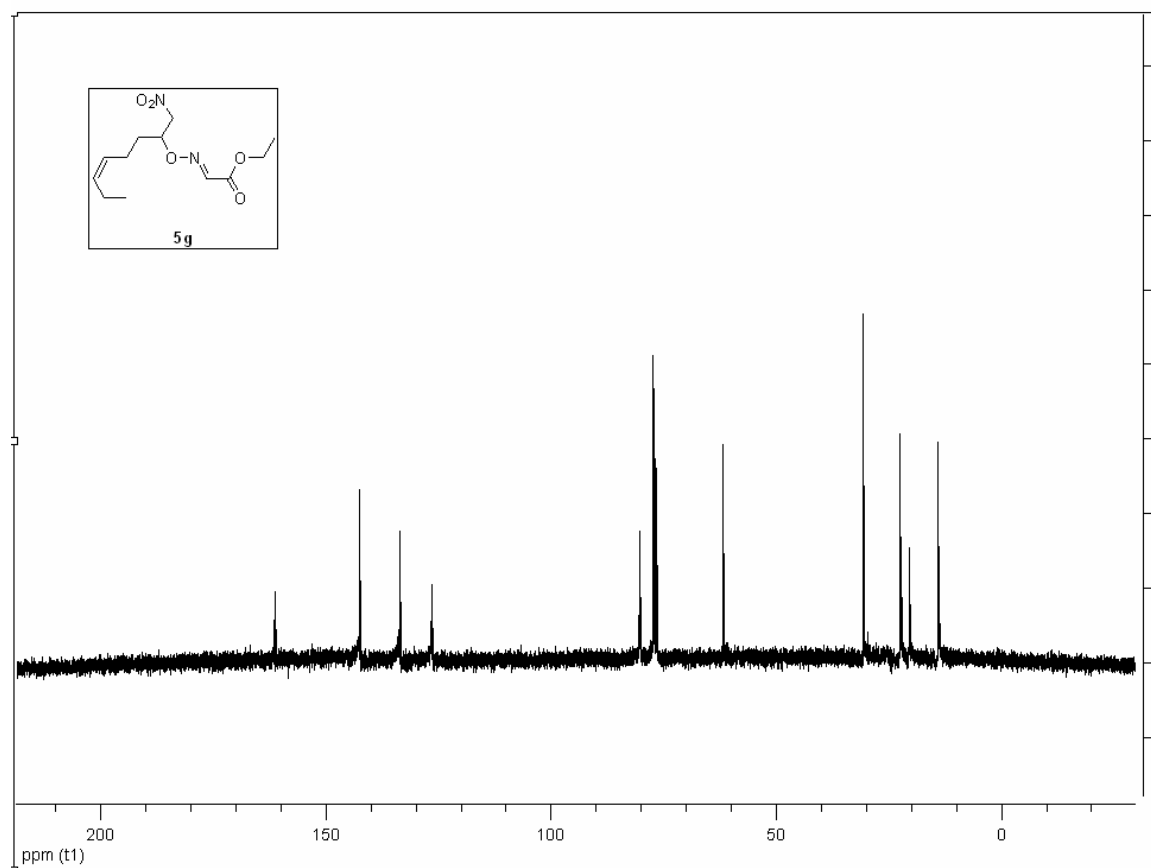

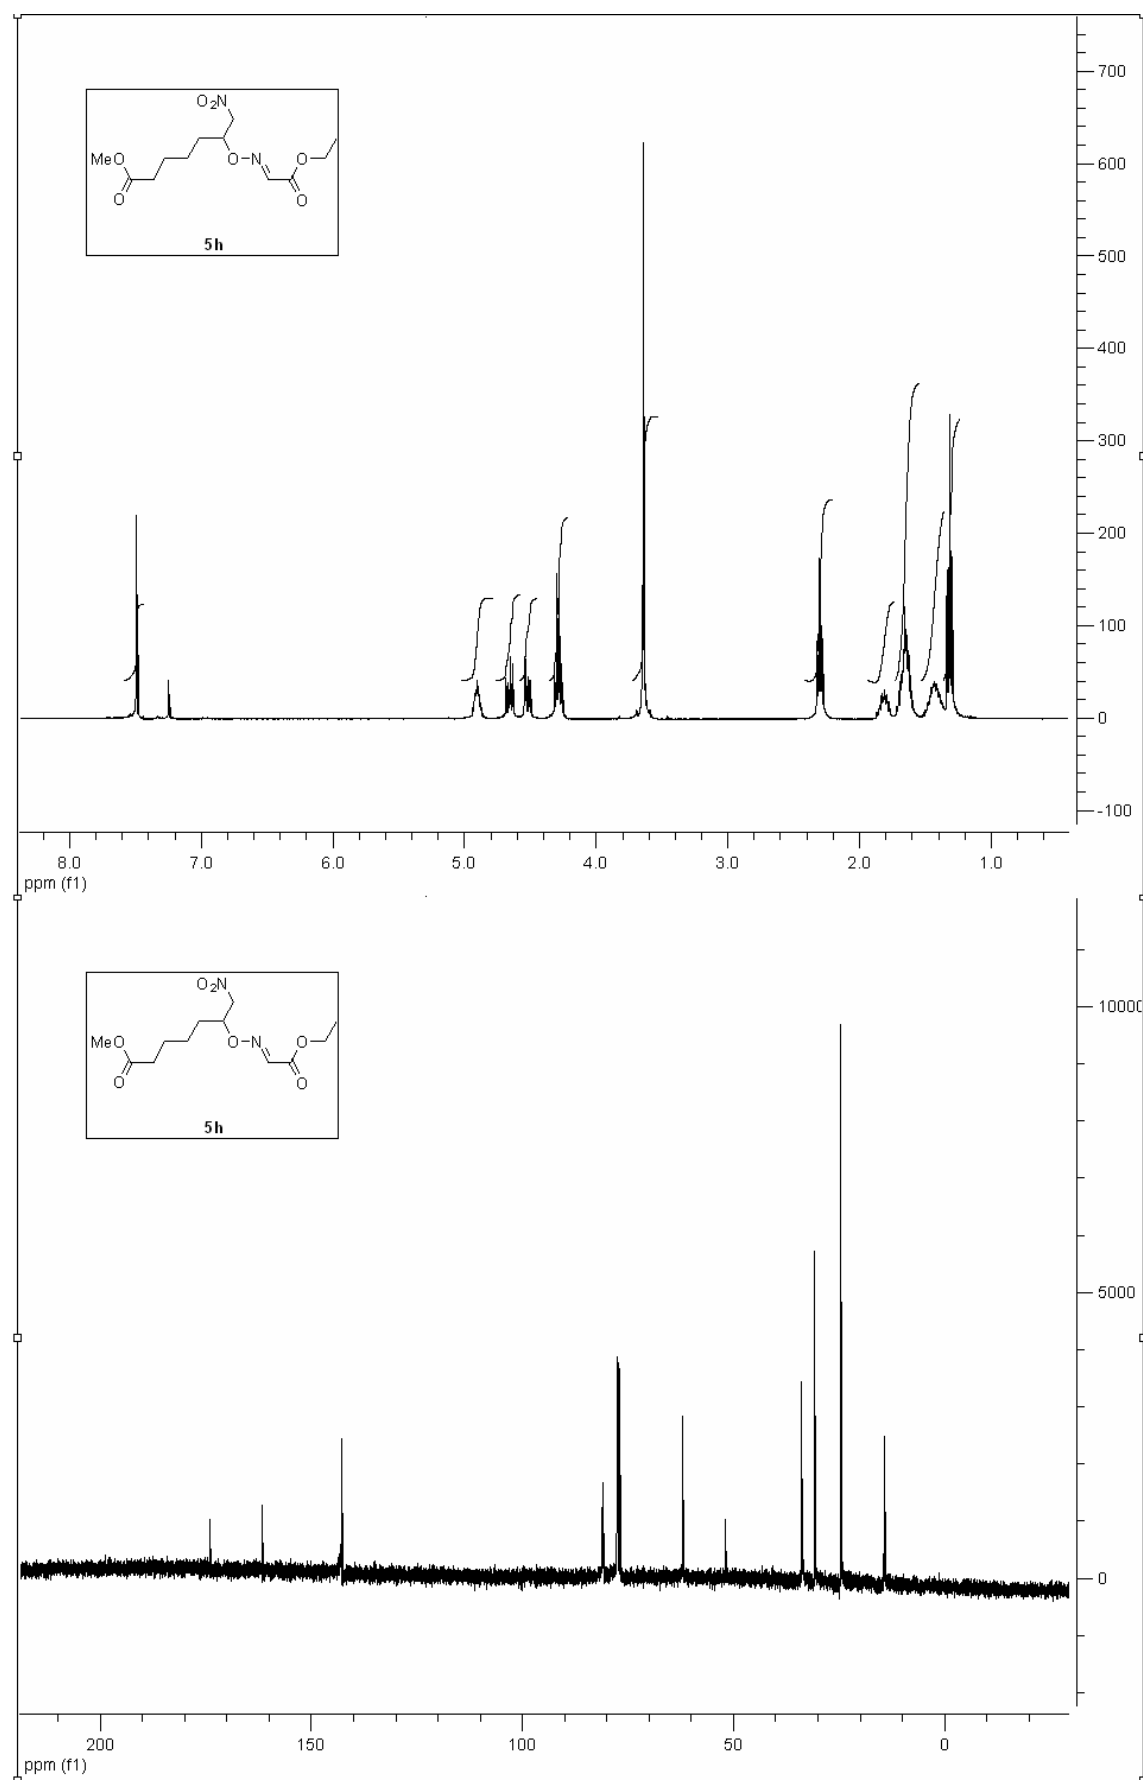

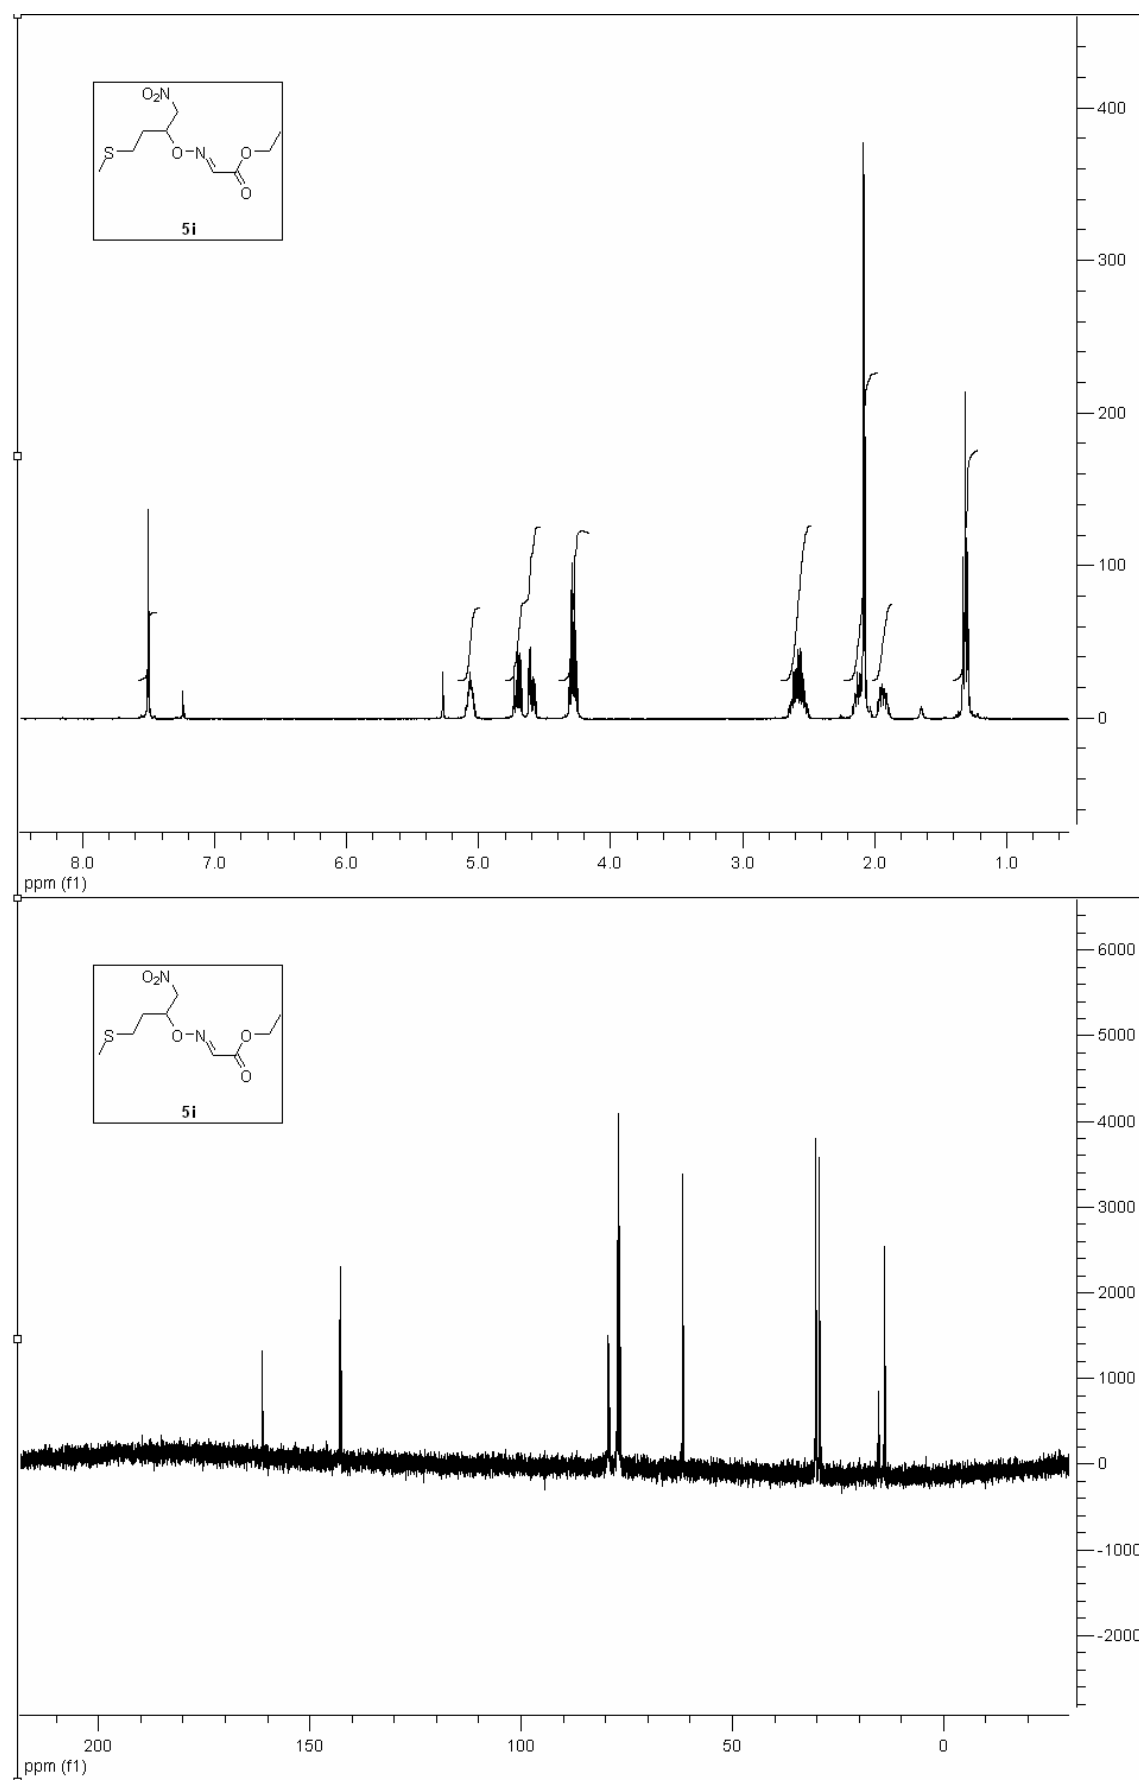



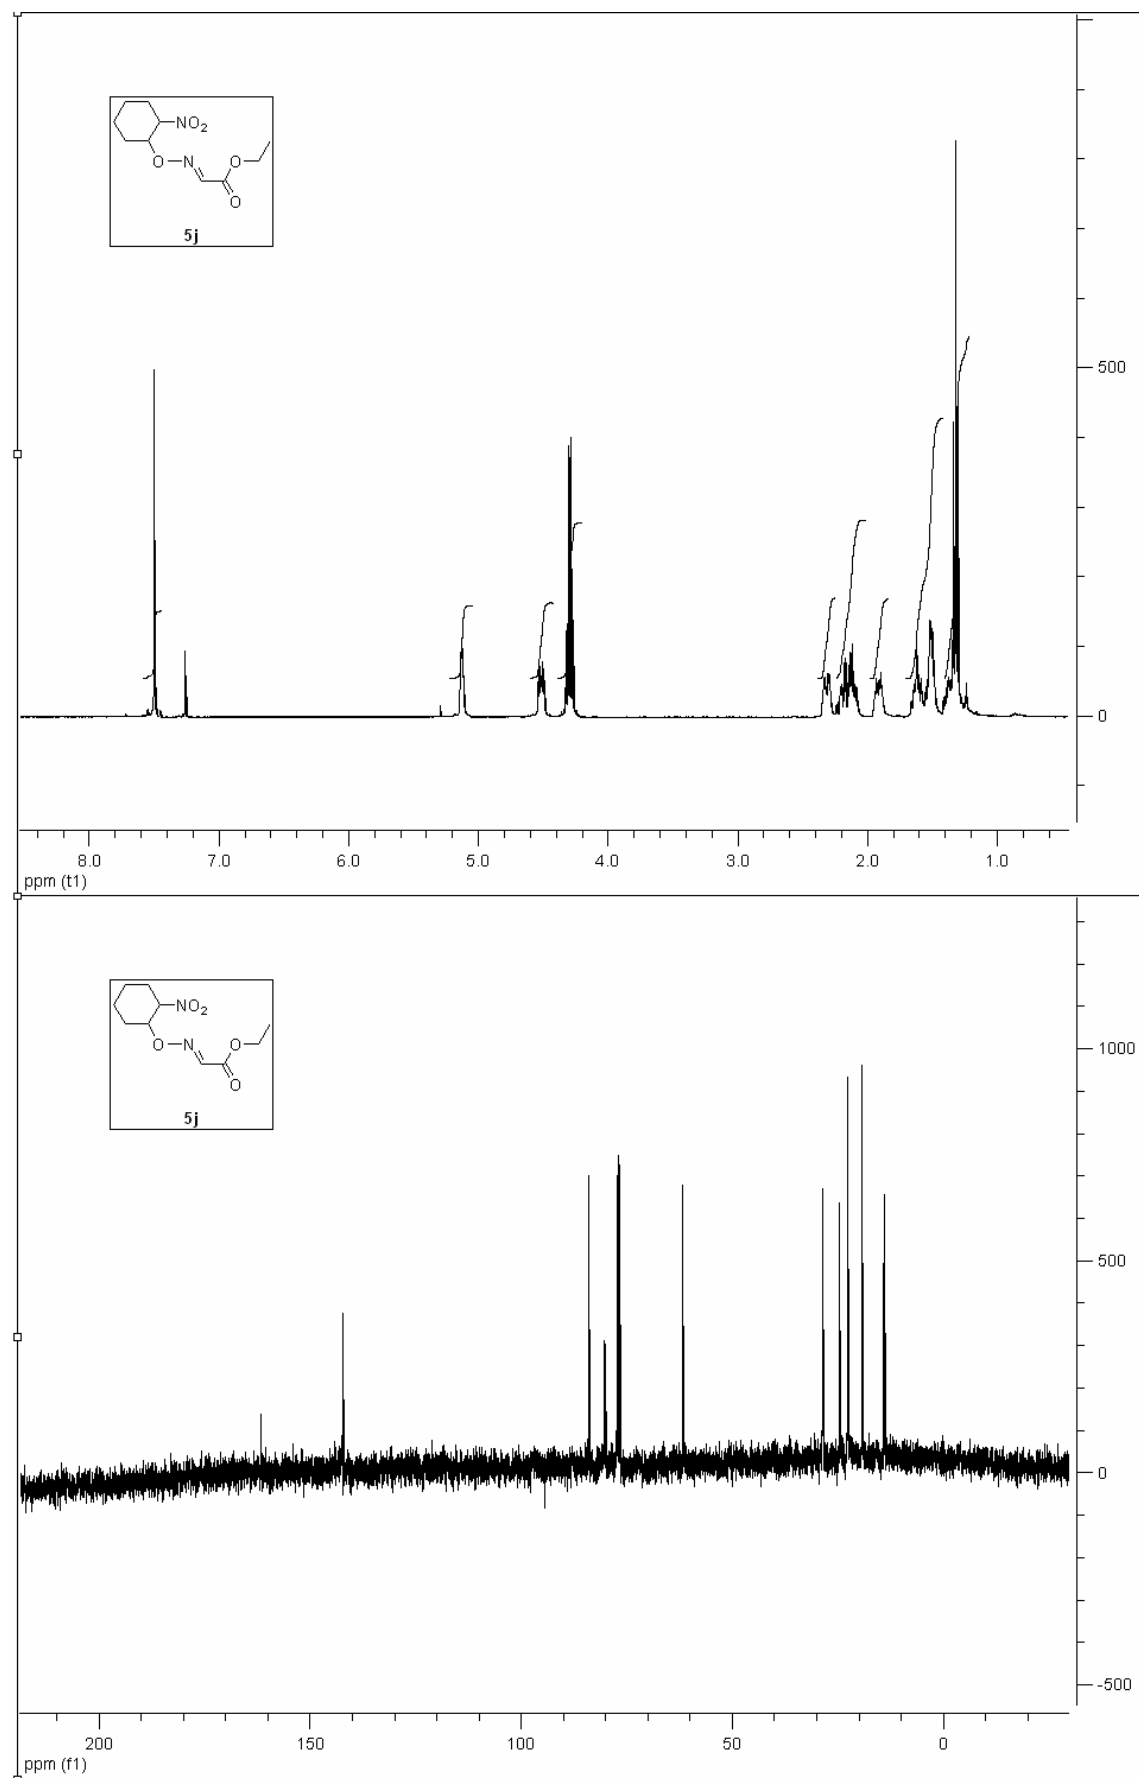

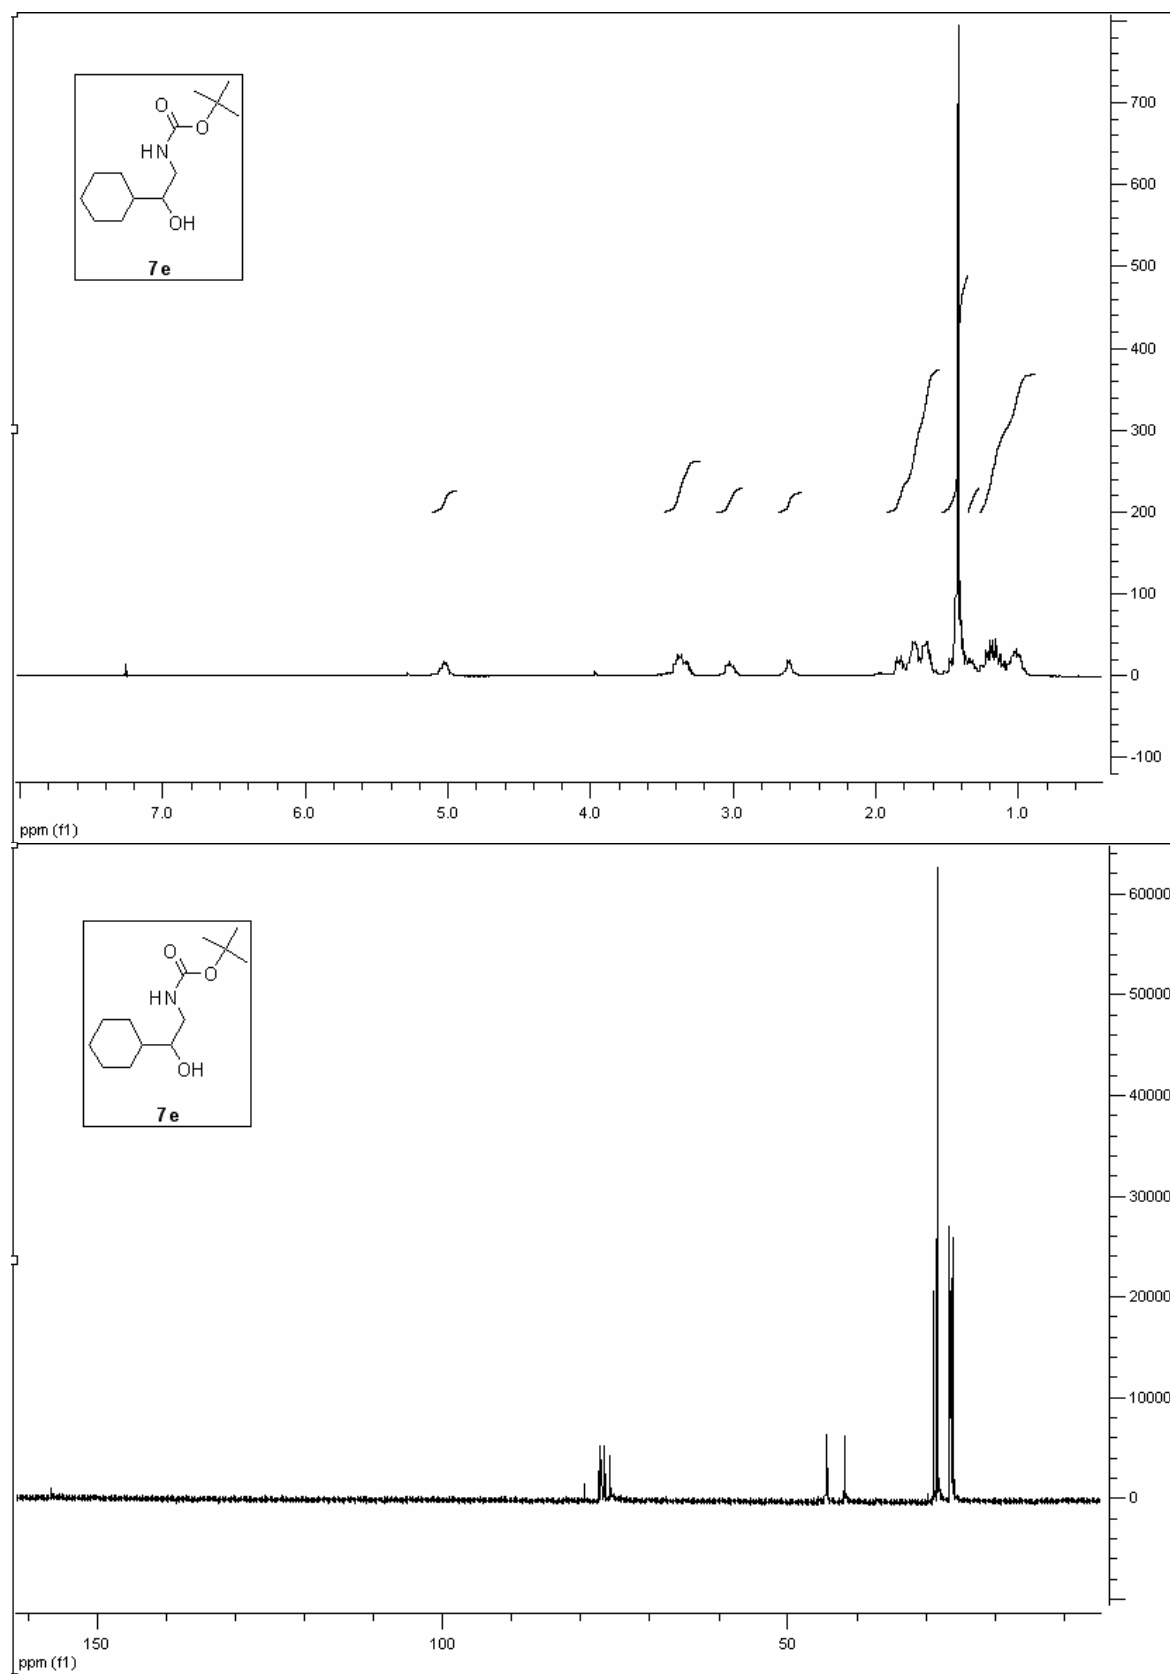

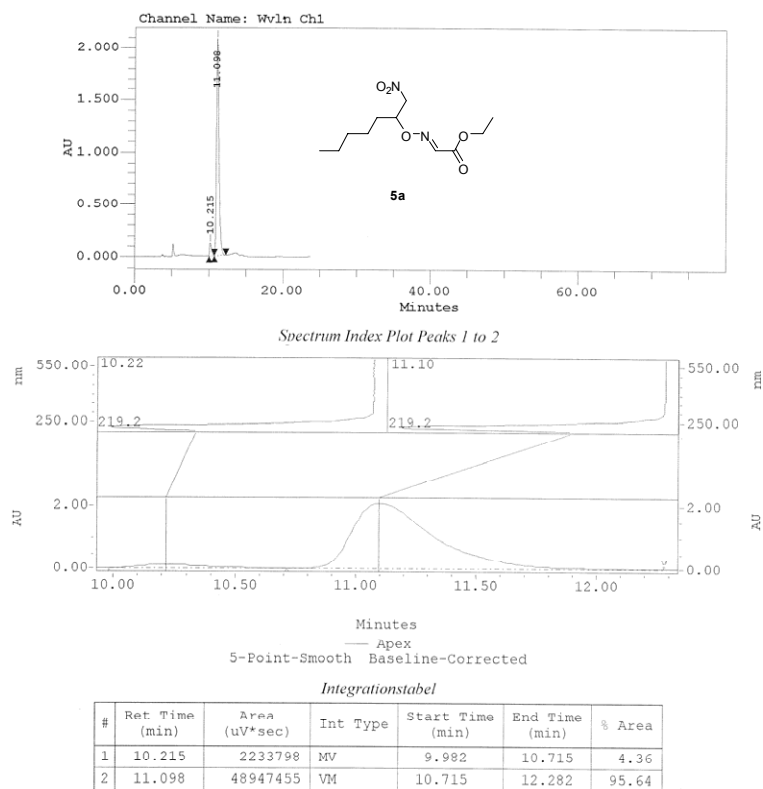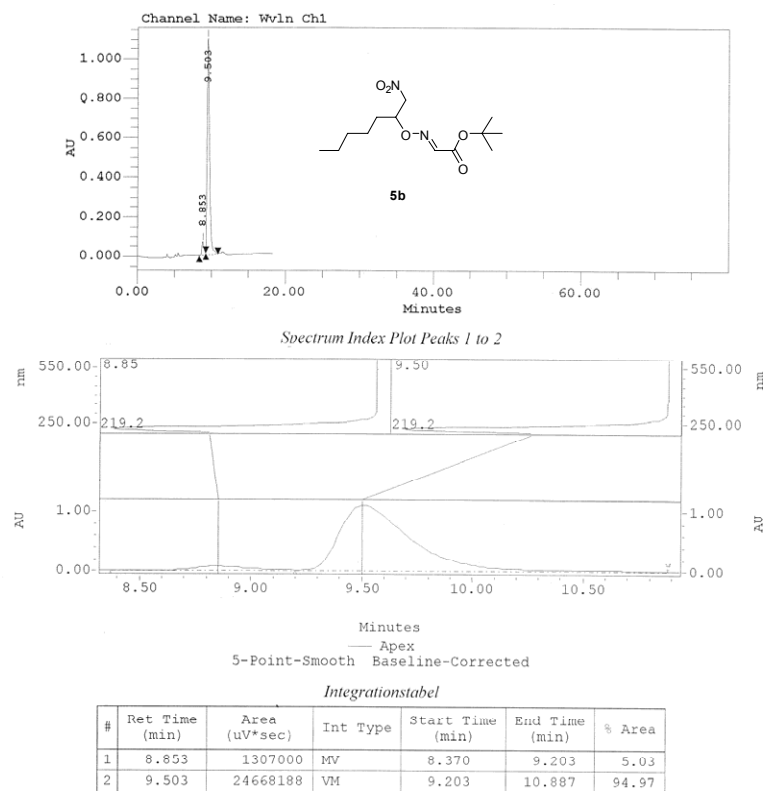

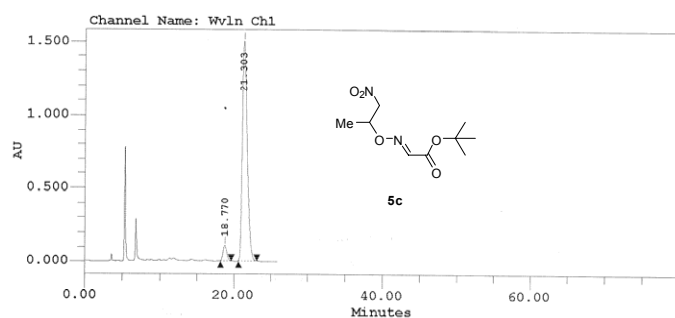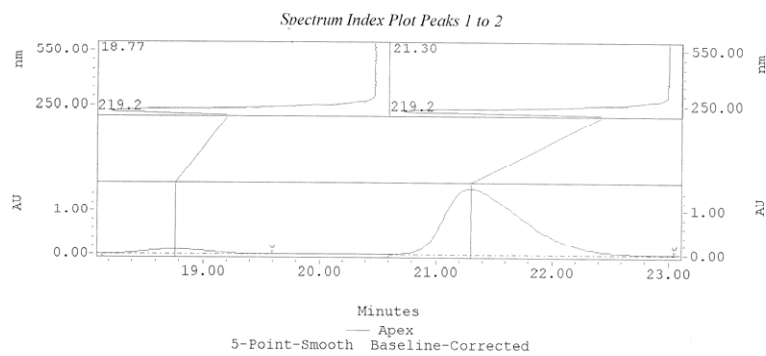

Integrationstabel

| # | Ret Time (min) | Area (uV*sec) | Int Type | Start Time (min) | End Time (min) | % Area |
|---|----------------|---------------|----------|------------------|----------------|--------|
| 1 | 18.770         | 3767273       | MM       | 18.153           | 19.603         | 5.10   |
| 2 | 21.303         | 70103880      | MM       | 20.603           | 23.053         | 94.90  |

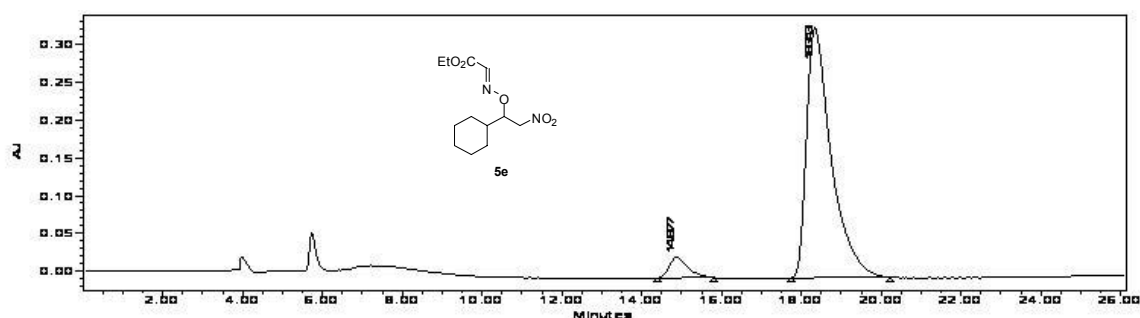

| # | RT     | Area     | % Area | Height |
|---|--------|----------|--------|--------|
| 1 | 14.877 | 858589   | 5.70   | 26827  |
| 2 | 18.343 | 14214954 | 94.30  | 330434 |

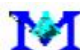

## Individual Sample Report

Reported by User: group (group)

Project Name: Peter

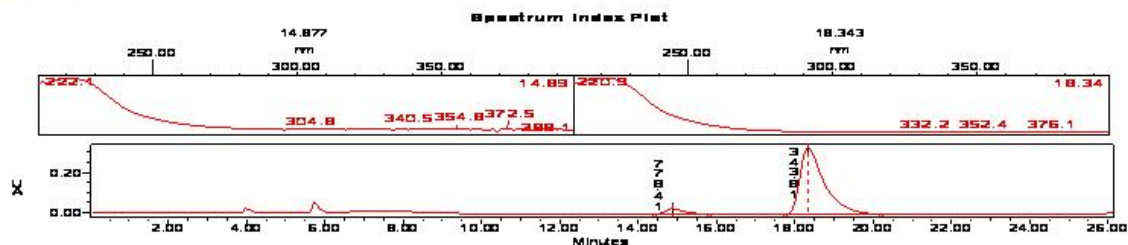

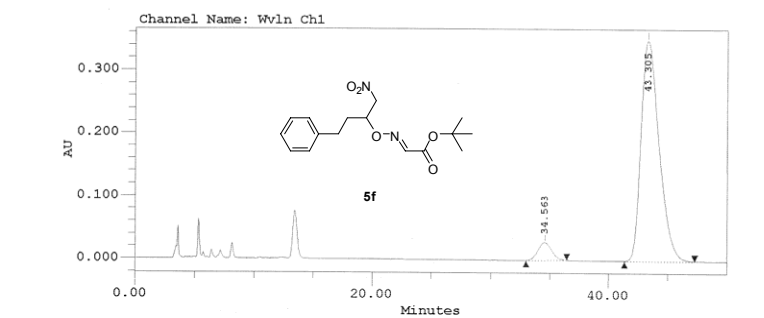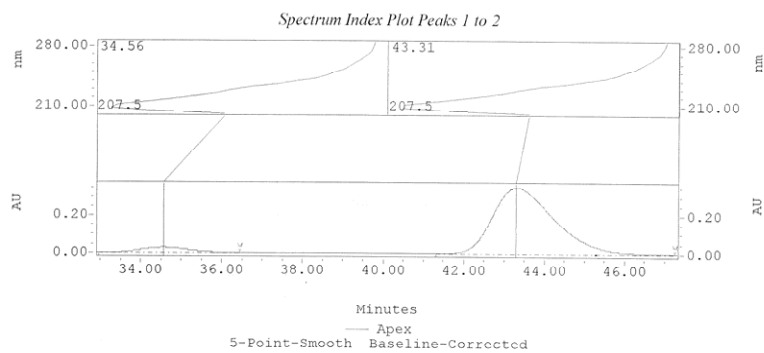

Integrationstabel

| # | Ret Time (min) | Area (uV*sec) | Int Type | Start Time (min) | End Time (min) | % Area |
|---|----------------|---------------|----------|------------------|----------------|--------|
| 1 | 34.563         | 2241529       | MM       | 32.963           | 36.438         | 5.69   |
| 2 | 43.305         | 37136662      | MM       | 41.322           | 47.263         | 94.31  |

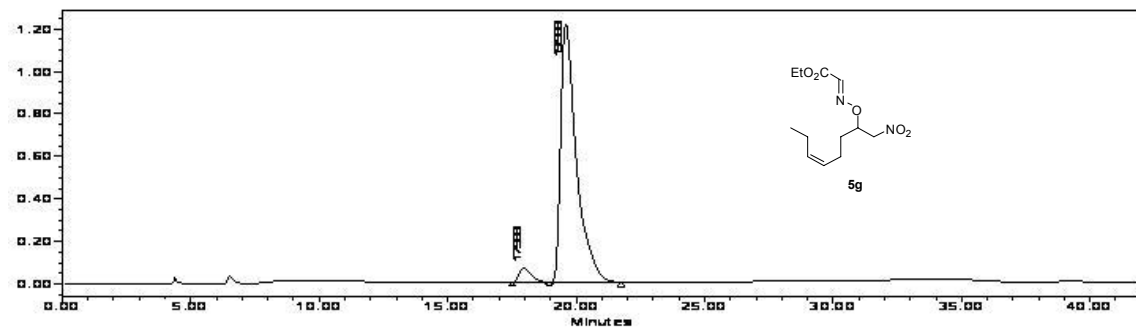

|   | RT     | Area     | % Area | Height  |
|---|--------|----------|--------|---------|
| 1 | 17.969 | 2243746  | 4.15   | 69051   |
| 2 | 19.599 | 51855764 | 95.85  | 1215589 |

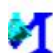

## Individual Sample Report

Reported by User: group (group)

Project Name: Peter

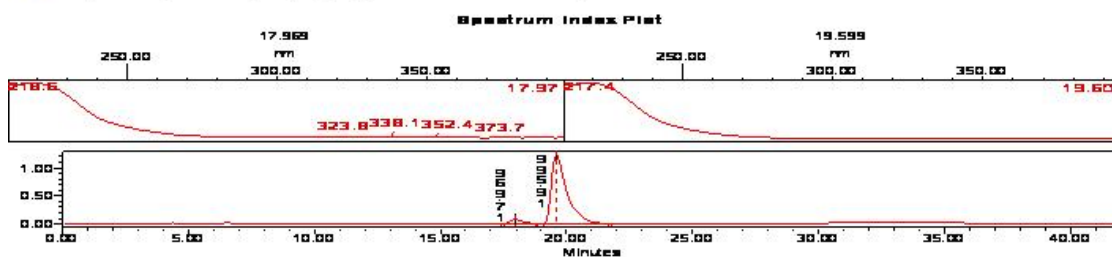

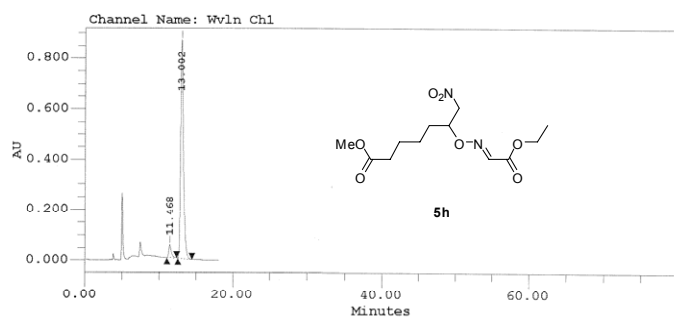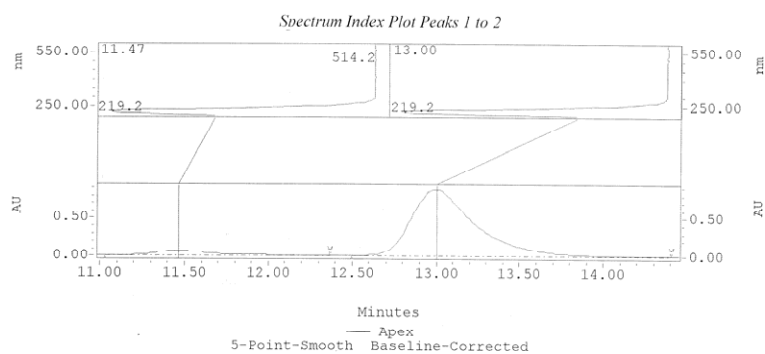

Integrationstabel

| # | Ret Time (min) | Area (uV*sec) | Int Type | Start Time (min) | End Time (min) | % Area |
|---|----------------|---------------|----------|------------------|----------------|--------|
| 1 | 11.468         | 1231108       | MM       | 11.035           | 12.368         | 5.04   |
| 2 | 13.002         | 23189672      | MM       | 12.502           | 14.402         | 94.96  |

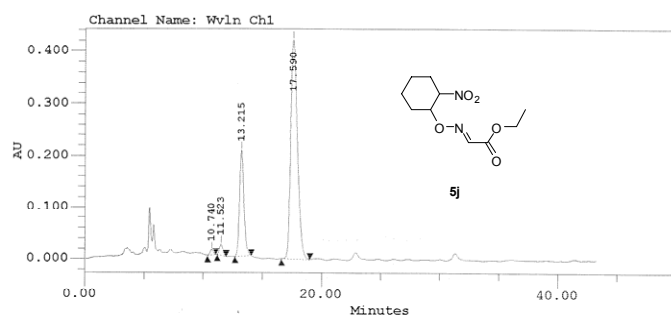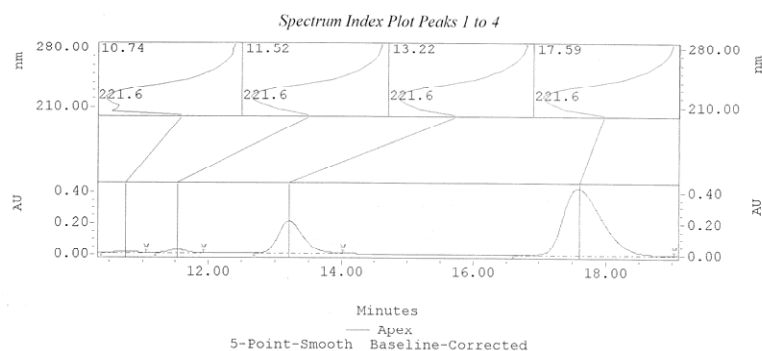

Integrationstabel

| # | Ret Time (min) | Area (uV*sec) | Int Type | Start Time (min) | End Time (min) | % Area |
|---|----------------|---------------|----------|------------------|----------------|--------|
| 1 | 10.740         | 180479        | MM       | 10.382           | 11.065         | 0.78   |
| 2 | 11.523         | 443394        | MM       | 11.207           | 11.932         | 1.92   |
| 3 | 13.215         | 5396809       | MM       | 12.690           | 14.032         | 23.33  |
| 4 | 17.590         | 17109679      | MM       | 16.607           | 19.040         | 73.97  |
